# Supplementary material for: Ultrafast and continuous synthesis of phase change nanocapsules using salt-accelerated microwave-assisted polymerization
Source: Royal Society of Chemistry journal article supplement (doi:10.1039/d2gc04804c), 2023-01-01
Supplement: d2gc04804c1.pdf [file d2gc04804c1.pdf]

**Supporting Information**

**Ultrafast and continuous synthesis of phase change nanocapsules by salt-accelerated microwave-assisted polymerization**

Dan Li,<sup>†a,b,c</sup> Xin Li,<sup>†a</sup> Jun Yan,<sup>a</sup> Yongqiang Qian,<sup>a</sup> Guxia Wang,<sup>d</sup> Yen Wei,<sup>a,e</sup> Shengwei Guo<sup>\*a,b,c</sup>

*<sup>a</sup>School of Materials Science and Engineering, North Minzu University, Yinchuan 750021, P. R. China*

*<sup>b</sup>International Scientific and Technological Cooperation Base of Industrial Solid Waste Cyclic Utilization and Advanced Materials, North Minzu University, Yinchuan 750021, P. R. China*

*<sup>c</sup>Key Laboratory of Polymer Materials and Manufacturing Technology, North Minzu University, Yinchuan 750021, P. R. China*

*<sup>d</sup>School of Chemistry and Chemical Engineering, North Minzu University, Yinchuan 750021, P. R. China*

*<sup>e</sup>Key Laboratory of Organic Optoelectronics and Molecular Engineering, Department of Chemistry, Tsinghua University, Beijing 100084, P. R. China*

*<sup>†</sup> These two authors contributed equally to this work and are co-first authors.*

*\* Corresponding author. E-mail address: [shengwei@nun.edu.cn](mailto:shengwei@nun.edu.cn) (S. W. Guo)*

## Tables and Figures

**Table S1.** The table of factors and levels in orthogonal experiment.

| Levels | Factors              |                     |                        |                        |
|--------|----------------------|---------------------|------------------------|------------------------|
|        | NaCl amount<br>(wt%) | Temperature<br>(°C) | Reaction time<br>(min) | Microwave Power<br>(W) |
| 1      | 0.8                  | 50                  | 10                     | 500                    |
| 2      | 1.0                  | 60                  | 20                     | 600                    |
| 3      | 2.0                  | 70                  | 30                     | 700                    |

**Table S2.** NanoPCMs synthesis conditions and corresponding morphologies

| No.             | NaCl amount<br>(wt%) | Temperature<br>(°C) | Reaction Time<br>(min) | Microwave power (W) | Particle Size <sup>a</sup> |     | DLS <sup>b</sup>          |      |
|-----------------|----------------------|---------------------|------------------------|---------------------|----------------------------|-----|---------------------------|------|
|                 |                      |                     |                        |                     | <i>D</i><br>(nm)           | PDI | <i>D<sub>h</sub></i> (nm) | PDI  |
| S <sub>1</sub>  | 0.8                  | 50                  | 10                     | 500                 | —                          | —   | —                         | —    |
| S <sub>2</sub>  | 1.0                  | 50                  | 20                     | 700                 | 168.6                      | —   | 2901.0                    | 0.20 |
| S <sub>3</sub>  | 2.0                  | 50                  | 30                     | 600                 | 84.3                       | —   | 531.6                     | 1.00 |
| S <sub>4</sub>  | 0.8                  | 60                  | 20                     | 600                 | 211.7                      | —   | 629.4                     | 0.39 |
| S <sub>5</sub>  | 1.0                  | 60                  | 30                     | 500                 | 97.8                       | —   | 331.5                     | 0.13 |
| S <sub>6</sub>  | 2.0                  | 60                  | 10                     | 700                 | 144.5                      | —   | 442.6                     | 0.32 |
| S <sub>7</sub>  | 0.8                  | 70                  | 30                     | 700                 | 145.7                      | —   | 739.7                     | 0.61 |
| S <sub>8</sub>  | 1.0                  | 70                  | 10                     | 600                 | 210.1                      | —   | 441.4                     | 0.38 |
| S <sub>9</sub>  | 2.0                  | 70                  | 20                     | 500                 | 9000.0                     | —   | 1104.0                    | 1.0  |
| S <sub>10</sub> | 1.0                  | 60                  | 10                     | 600                 | 95.4                       | —   | 520.7                     | 0.15 |
| S <sub>11</sub> | 0                    | 60                  | 720                    | 600                 | —                          | —   | —                         | —    |
| S <sub>12</sub> | 0                    | 70                  | 420                    | 600                 | 149.2                      | —   | 628.0                     | 0.09 |
| S <sub>13</sub> | 1.0                  | 70                  | 720                    | —                   | 185.6                      | —   | 285.5                     | 0.29 |
| S <sub>14</sub> | 0                    | 70                  | 720                    | —                   | 6440.0                     | —   | 1269.0                    | 0.75 |

<sup>a</sup> Measured by ImageJ software. D

<sup>b</sup> Determined by DLS.

**Table S3.** Orthogonal table influence factor.

| Test number    | NaCl Content<br>(wt%) | Temperature<br>(°C) | Time<br>(min) | Microwave Power<br>(W) | E<br>(%) |
|----------------|-----------------------|---------------------|---------------|------------------------|----------|
| S <sub>1</sub> | 0.8                   | 50                  | 10            | 500                    | —        |
| S <sub>2</sub> | 1.0                   | 50                  | 20            | 700                    | 3.57     |
| S <sub>3</sub> | 2.0                   | 50                  | 30            | 600                    | 14.69    |
| S <sub>4</sub> | 0.8                   | 60                  | 20            | 600                    | 48.70    |
| S <sub>5</sub> | 1.0                   | 60                  | 30            | 500                    | 51.28    |
| S <sub>6</sub> | 2.0                   | 60                  | 10            | 700                    | 49.27    |
| S <sub>7</sub> | 0.8                   | 70                  | 30            | 700                    | 32.74    |
| S <sub>8</sub> | 1.0                   | 70                  | 10            | 600                    | 49.45    |

|                   |                                                                              |        |       |        |       |
|-------------------|------------------------------------------------------------------------------|--------|-------|--------|-------|
| S <sub>9</sub>    | 2.0                                                                          | 70     | 20    | 500    | 36.77 |
| K1                | 81.44                                                                        | 18.25  | 98.72 | 88.04  |       |
| K2                | 104.29                                                                       | 149.25 | 89.04 | 112.84 |       |
| K3                | 100.73                                                                       | 118.96 | 98.70 | 85.58  |       |
| k1                | 27.15                                                                        | 6.08   | 32.91 | 29.35  |       |
| k2                | 34.80                                                                        | 49.75  | 29.68 | 37.61  |       |
| k3                | 33.58                                                                        | 39.65  | 32.90 | 28.53  |       |
| R                 | 7.65                                                                         | 43.67  | 3.23  | 9.08   |       |
| Degree of factors | Temperature > Microwave Power > NaCl Content > Time                          |        |       |        |       |
| Best level        | 1.0                                                                          | 60     | 10    | 600    |       |
| Best group        | NaCl Content 1.0wt% - Temperature 60 °C - Time 10 min- Microwave Power 600 W |        |       |        |       |

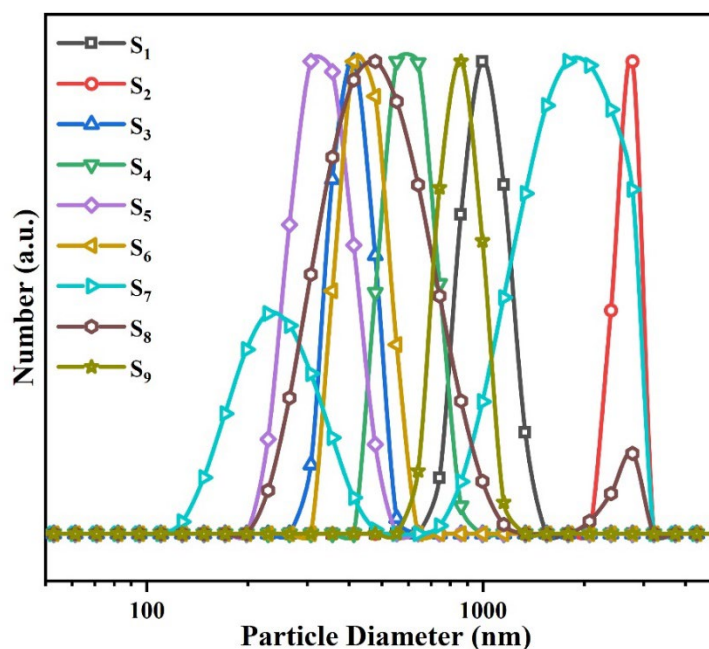

Fig. S1 DLS profiles of the S<sub>1</sub>-S<sub>9</sub> NanoPCMs.

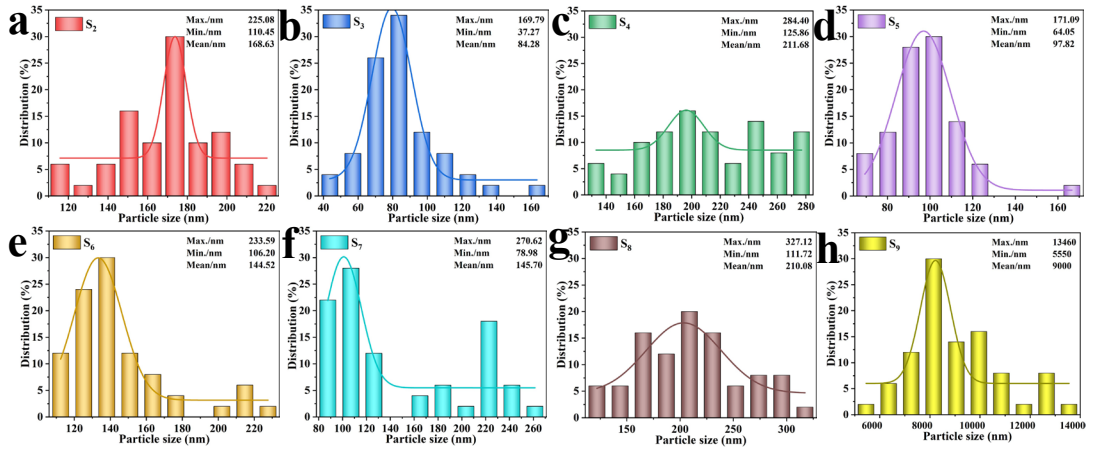

Fig. S2 Measure the particle size statistics of S<sub>2</sub>-S<sub>9</sub> by image software.

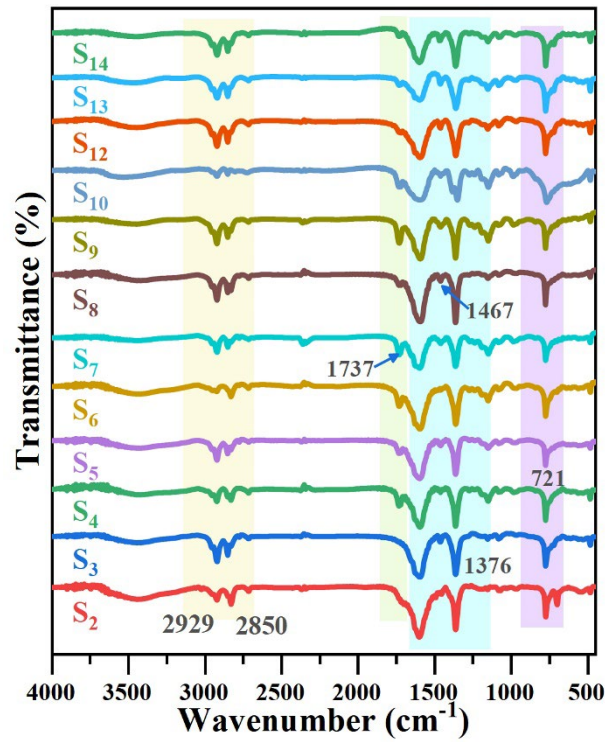

Fig. S3 FTIR spectra of NanoPCMs.

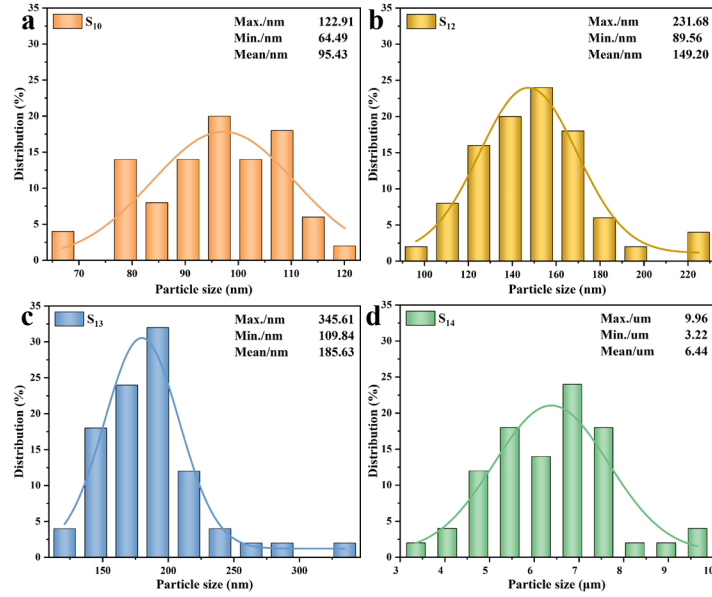

Fig. S4 Measure the particle size statistics of S<sub>10</sub>, S<sub>12</sub>, S<sub>13</sub> and S<sub>14</sub> by image software.

Table S4. Thermal properties of *n*-oct, S<sub>10</sub>, S<sub>12</sub>, S<sub>13</sub> and S<sub>14</sub>.

| Sample          | Melting          |                       | Crystallization   |                          |                   |                          |                        |                               | $\Delta H_c$<br>(J/g) | R<br>(%) | E<br>(%) |
|-----------------|------------------|-----------------------|-------------------|--------------------------|-------------------|--------------------------|------------------------|-------------------------------|-----------------------|----------|----------|
|                 | $T_{mo}$<br>(°C) | $\Delta H_m$<br>(J/g) | $\alpha$ peak     |                          | $\beta$ peak      |                          | $\gamma$ peak          |                               |                       |          |          |
|                 |                  |                       | $T_{coa}$<br>(°C) | $\Delta H_{ca}$<br>(J/g) | $T_{cob}$<br>(°C) | $\Delta H_{cb}$<br>(J/g) | $T_{co\gamma}$<br>(°C) | $\Delta H_{c\gamma}$<br>(J/g) |                       |          |          |
| <i>n</i> -oct   | 20.9             | 226.3                 | 26.1              | 227.9                    | —                 | —                        | —                      | —                             | 227.9                 | —        | —        |
| S <sub>10</sub> | 24.0             | 115.7                 | 26.0              | 28.3                     | —                 | —                        | 19.2                   | 23.0                          | 114.9                 | 51.1     | 50.8     |
| S <sub>12</sub> | 25.8             | 106.2                 | 26.0              | 35.9                     | 19.1              | 3.6                      | 10.6                   | 13.3                          | 109.2                 | 46.9     | 47.4     |
| S <sub>13</sub> | 25.6             | 93.7                  | 25.5              | 45.5                     | 17.8              | 0.1                      | 10.6                   | 5.8                           | 94.7                  | 41.4     | 41.5     |
| S <sub>14</sub> | 26.0             | 97.9                  | 26.0              | 48.7                     | —                 | —                        | 10.0                   | 7.7                           | 99.2                  | 43.3     | 43.3     |

$T_{mo}$ : onset of melting point;  $\Delta H_m$ : melting enthalpy;  $T_{coa}$ : onset of  $\alpha$  crystallization point;  $T_{cob}$ : onset of  $\beta$  crystallization point;  $T_{co\gamma}$ : onset of  $\gamma$  crystallization point;  $\Delta H_{ca}$ :  $\alpha$  crystallization enthalpy;  $\Delta H_{cb}$ :  $\beta$  crystallization enthalpy;  $\Delta H_{c\gamma}$ :  $\gamma$  crystallization enthalpy;  $\Delta H_c$ : crystallization enthalpy.

Table S5. Thermal stability of *n*-oct, S<sub>10</sub>, S<sub>12</sub>, S<sub>13</sub> and S<sub>14</sub>.

| Sample          | First step    |           | Second step   |           | $T_e$ (°C) | $W_{Re}$ (%) |
|-----------------|---------------|-----------|---------------|-----------|------------|--------------|
|                 | $T_{10}$ (°C) | $W_1$ (%) | $T_{20}$ (°C) | $W_2$ (%) |            |              |
| <i>n</i> -oct   | 149.6         | 99.3      | —             | —         | 220.5      | 0.7          |
| S <sub>10</sub> | 208.8         | 62.5      | 386.4         | 30.0      | 511.9      | 7.5          |
| S <sub>12</sub> | 195.2         | 45.7      | 387.1         | 40.6      | 505.5      | 13.7         |
| S <sub>13</sub> | 199.2         | 49.1      | 397.6         | 36.0      | 506.8      | 14.9         |
| S <sub>14</sub> | 194.6         | 55.6      | 392.1         | 34.3      | 507.6      | 10.1         |

$T_{10}$ : fastest decomposition temperature of the first mass loss;  $T_{20}$ : fastest decomposition temperature of the second mass loss;  $W_1$ : mass percentage content of the first mass loss;  $W_2$ : mass percentage content of the second mass loss;  $T_e$ : endpoint of the degradation temperature;  $W_{Re}$ : residual mass fraction.
